# Supplementary material for: Synthesis of oligodiaminomannoses and analysis of their RNA duplex binding properties and their potential application as siRNA-based drugs
Source: Royal Society of Chemistry journal article supplement (doi:10.1039/c5ob01384d), 2015-01-01
Supplement: c5ob01384d1.pdf [file c5ob01384d1.pdf]

# Synthesis of oligodiaminomannoses and analysis of their RNA duplex binding properties and their potential application as siRNA-based drugs

**Rintaro Iwata<sup>a,c</sup>, Akiko Doi<sup>b,c</sup>, Yusuke Maeda<sup>a,c</sup> and Takeshi Wada<sup>\*a, b, c</sup>**

*<sup>a</sup>Faculty of Pharmaceutical Sciences, Tokyo University of Science, 2641 Yamazaki, Noda 278-8510 Japan, <sup>b</sup>Department of Medical Genome Sciences, Graduate School of Frontier Sciences, The University of Tokyo, Bioscience Building 702, 5-1-5 Kashiwanoha, Kashiwa, Chiba 277-8562, Japan, <sup>c</sup>JST-CREST, K's Gobancho 6F, 7, Gobancho, Chiyoda-ku, Tokyo 102-0076, Japan*

## Table of contents

|                                                             |   |
|-------------------------------------------------------------|---|
| UV melting curves                                           | 2 |
| <sup>1</sup> H and <sup>13</sup> C NMR spectra of compounds | 4 |

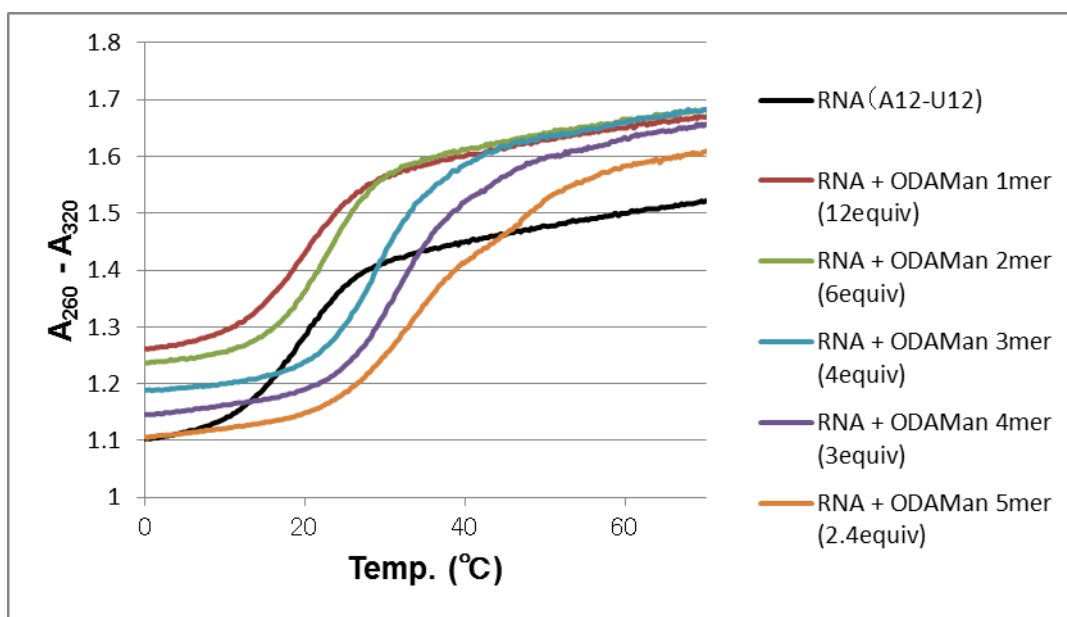

**Figure S1. UV melting curve of rA12-rU12 (5  $\mu$ M) in the presence of ODAMans**

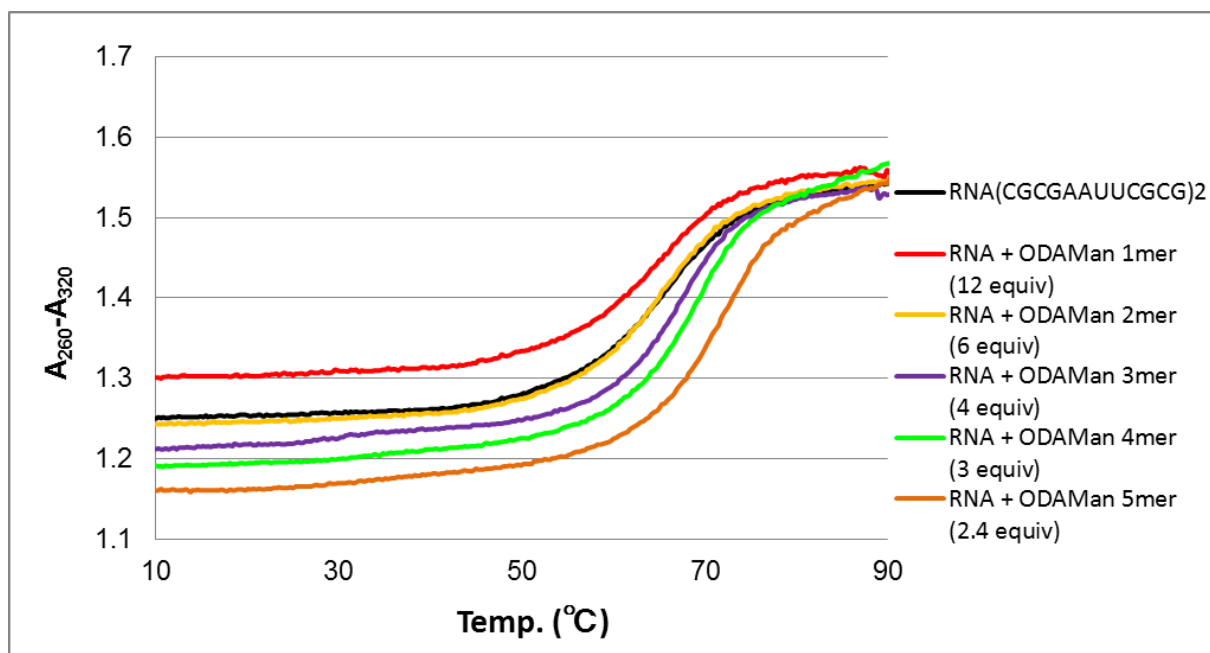

**Figure S2. UV melting curve of r(CGCGAAUUCGCG)<sub>2</sub> (5  $\mu$ M) in the presence of ODAMans**

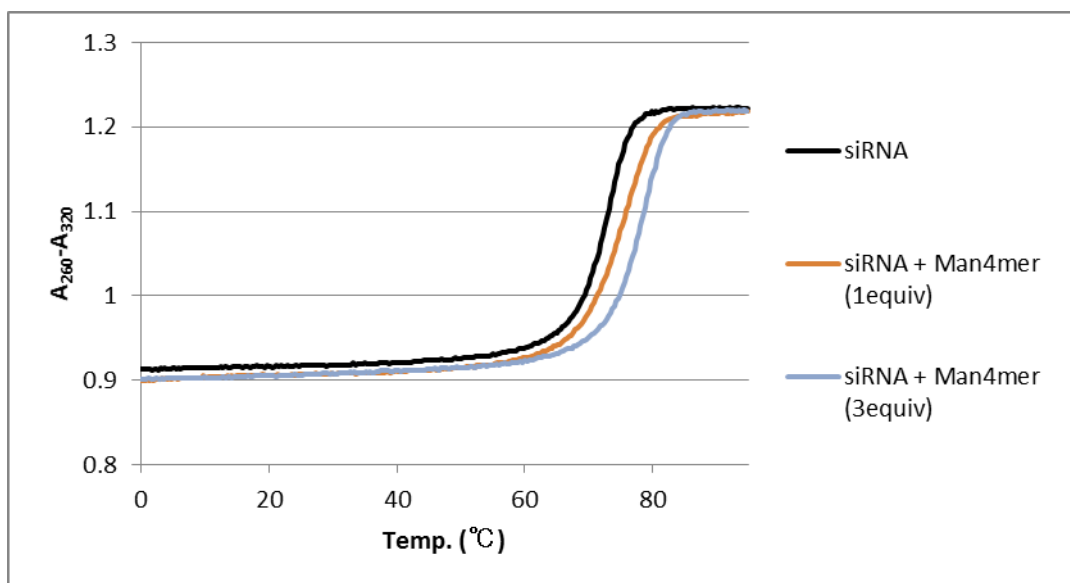

**Figure S3. UV melting curve of siRNA (2.5  $\mu\text{M}$ ) in the presence of ODAMans**

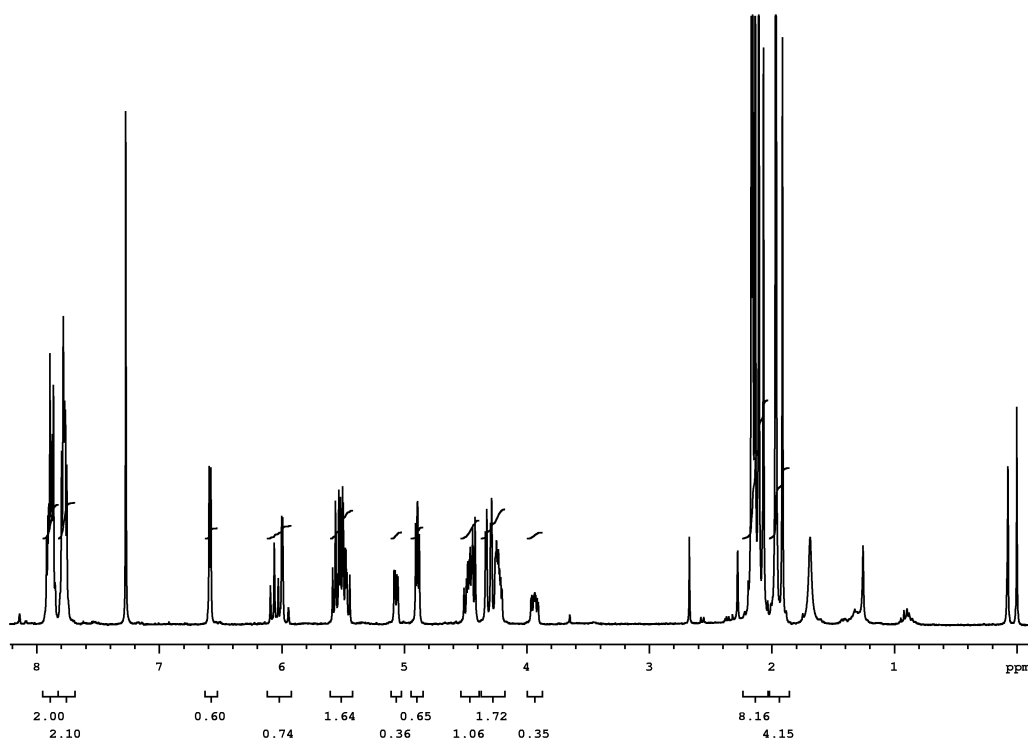

**Figure S4.** <sup>1</sup>H NMR spectrum of compound **2** in CDCl<sub>3</sub> (300 MHz).

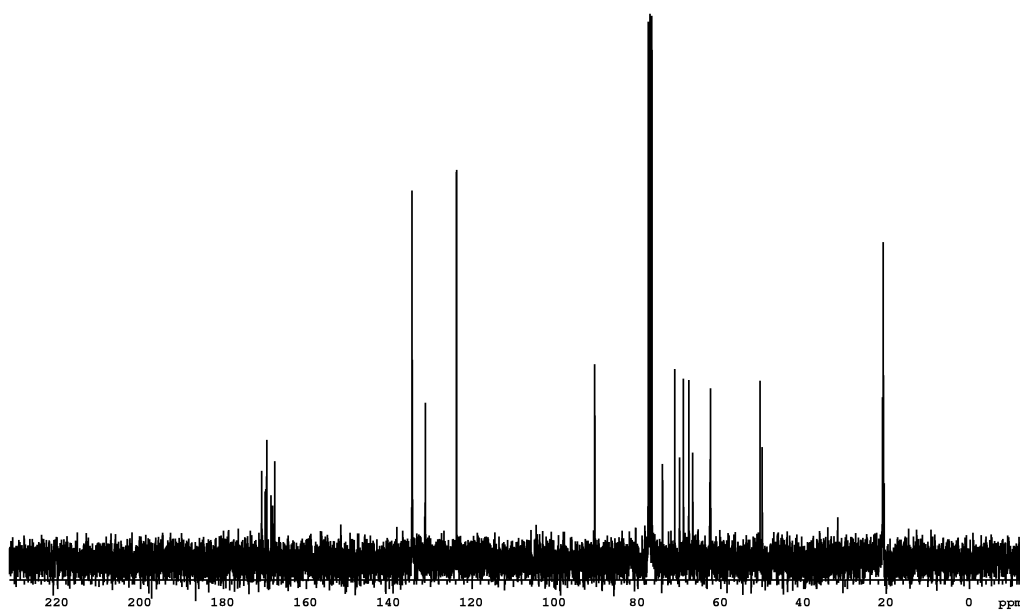

**Figure S5.** <sup>13</sup>C NMR spectrum of compound **2** in CDCl<sub>3</sub> (75.45 MHz).

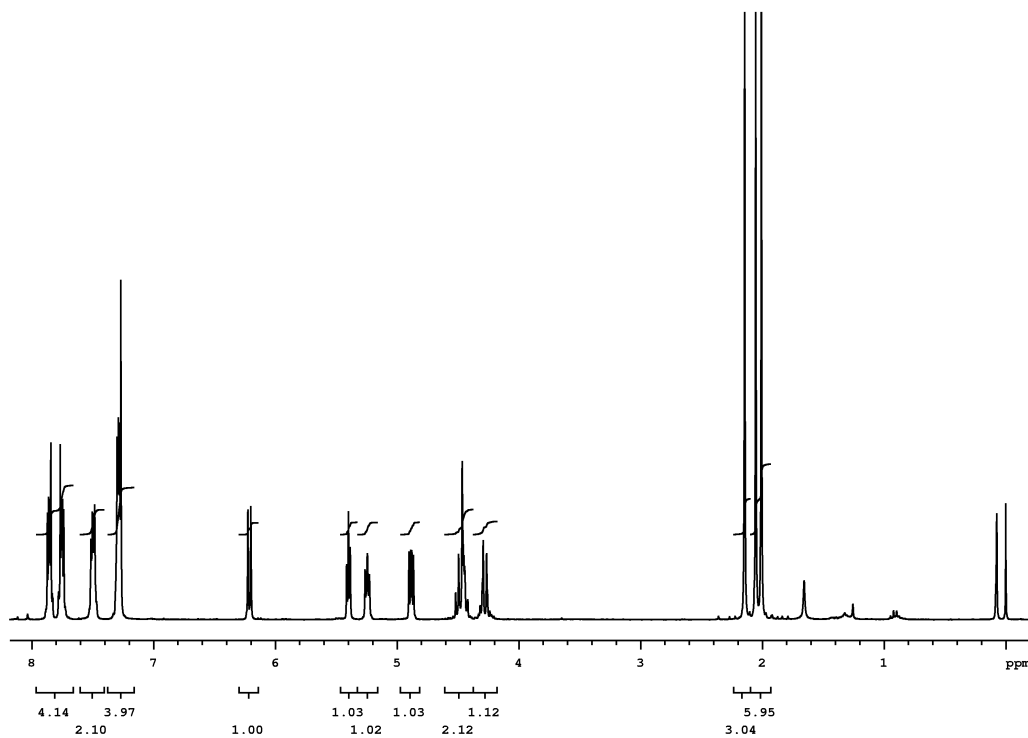

**Figure S6.**  $^1\text{H}$  NMR spectrum of compound **3** in  $\text{CDCl}_3$  (300 MHz).

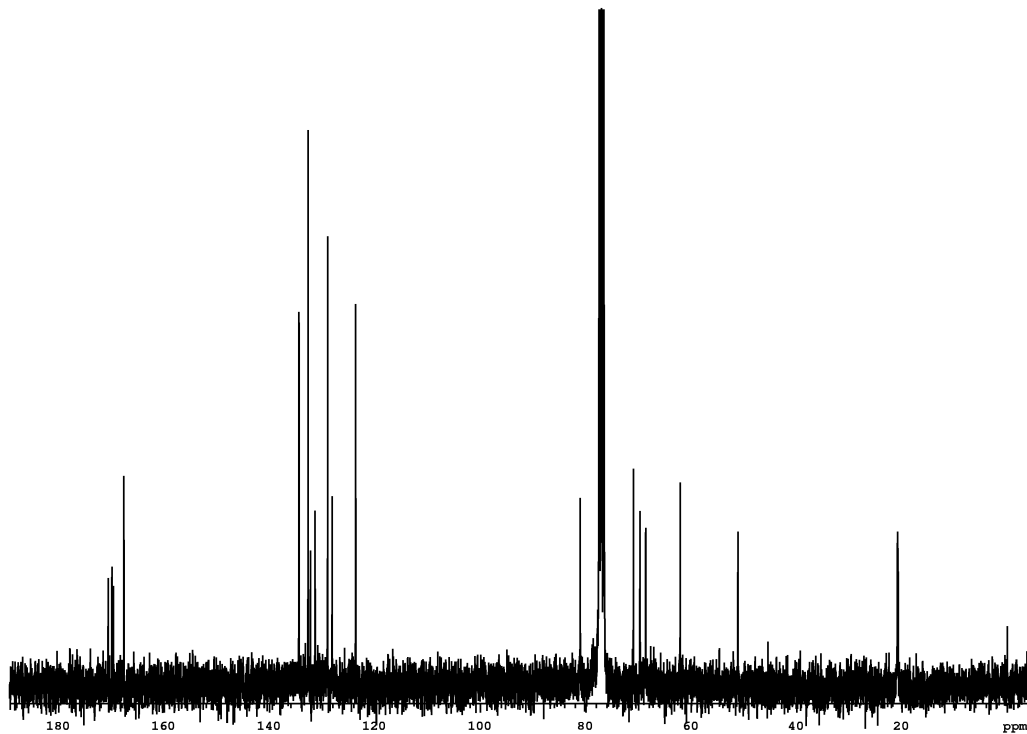

**Figure S7.**  $^{13}\text{C}$  NMR spectrum of compound **3** in  $\text{CDCl}_3$  (75.45 MHz).

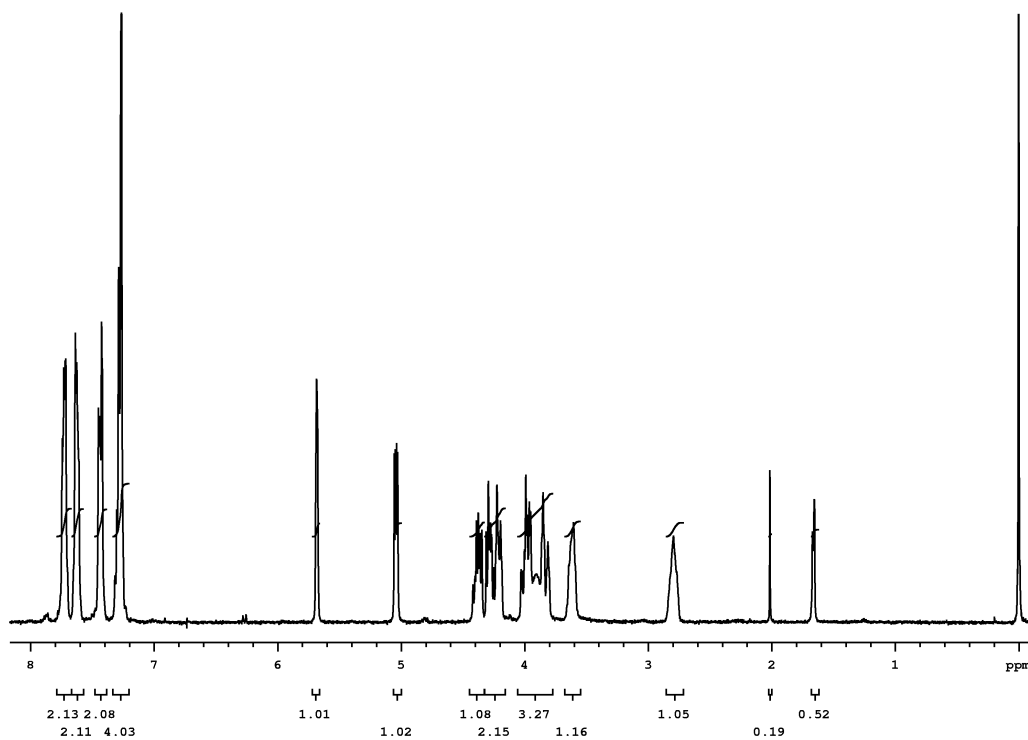

**Figure S8.** <sup>1</sup>H NMR spectrum of compound **4** in CDCl<sub>3</sub> (300 MHz).

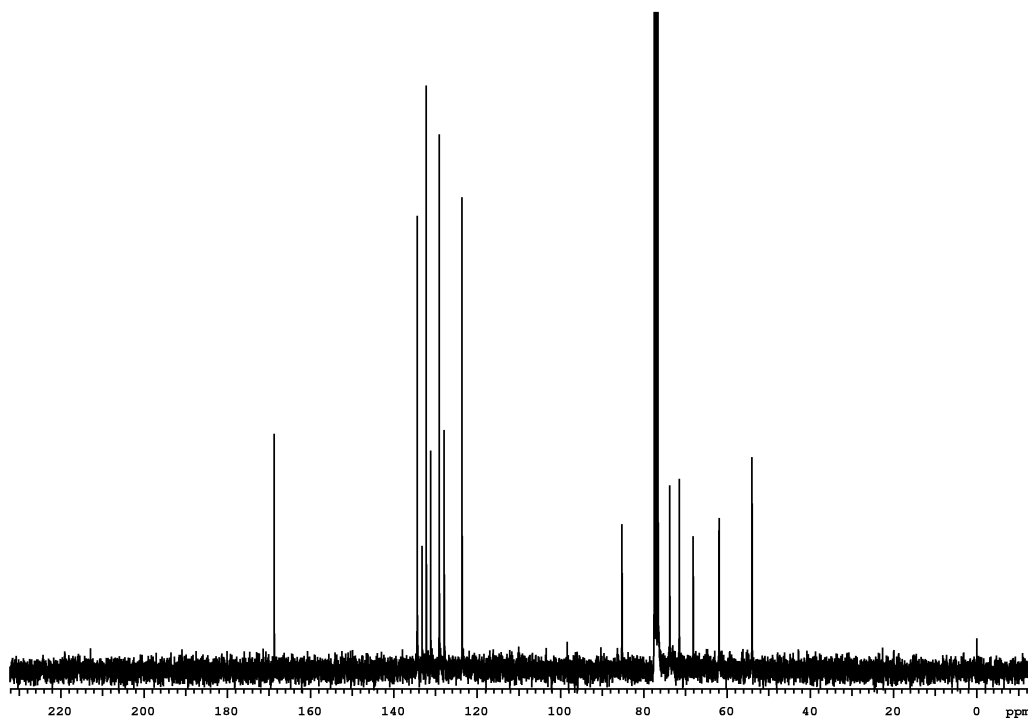

**Figure S9.** <sup>13</sup>C NMR spectrum of compound **4** in CDCl<sub>3</sub> (75.45 MHz).

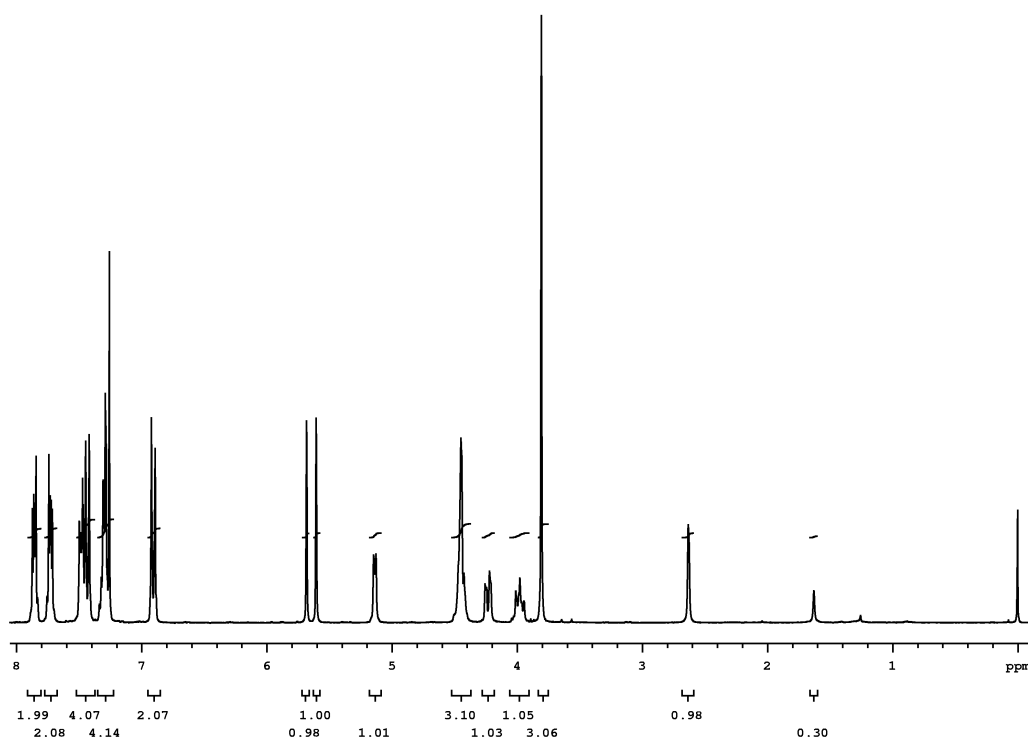

**Figure S10.** <sup>1</sup>H NMR spectrum of compound **5** in CDCl<sub>3</sub> (300 MHz).

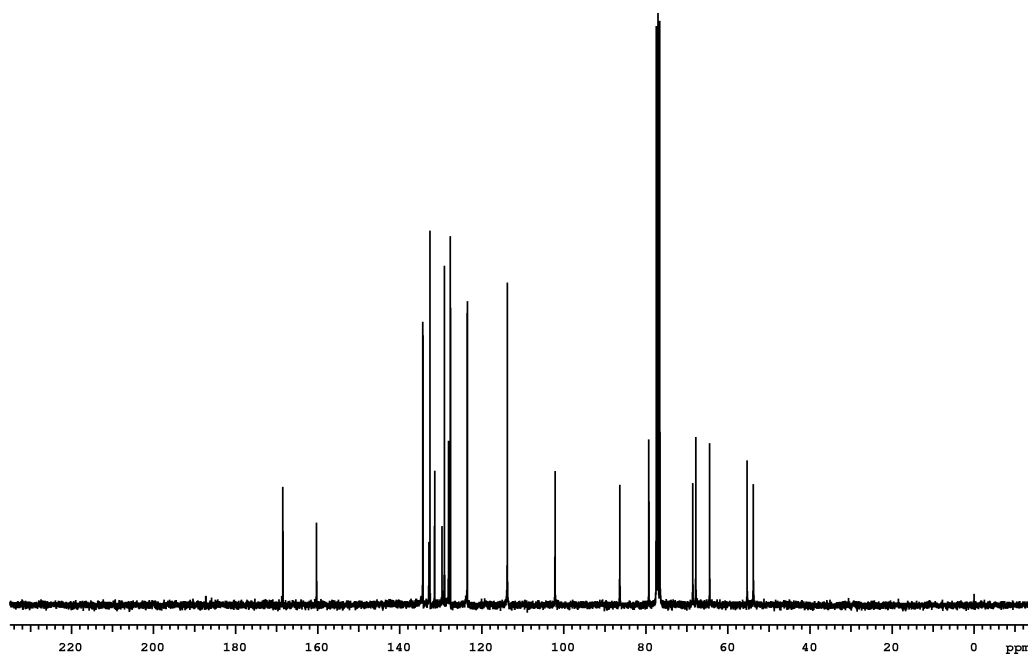

**Figure S11.** <sup>13</sup>C NMR spectrum of compound **5** in CDCl<sub>3</sub> (300 MHz).

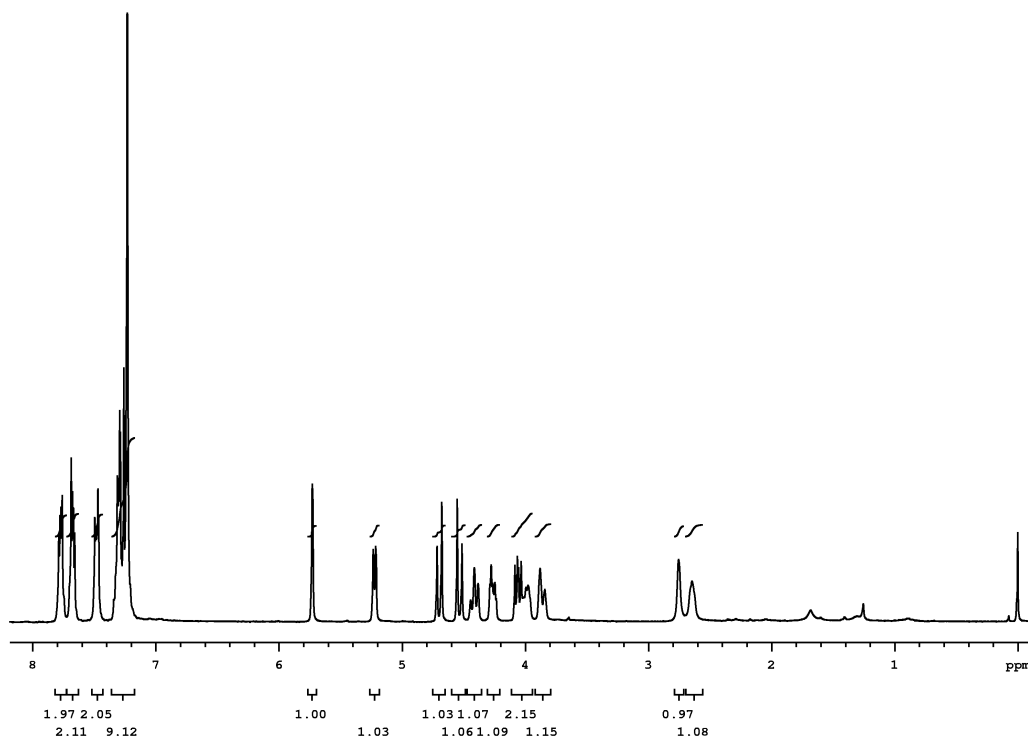

**Figure S12.**  $^1\text{H}$  NMR spectrum of compound **6** in  $\text{CDCl}_3$  (300 MHz).

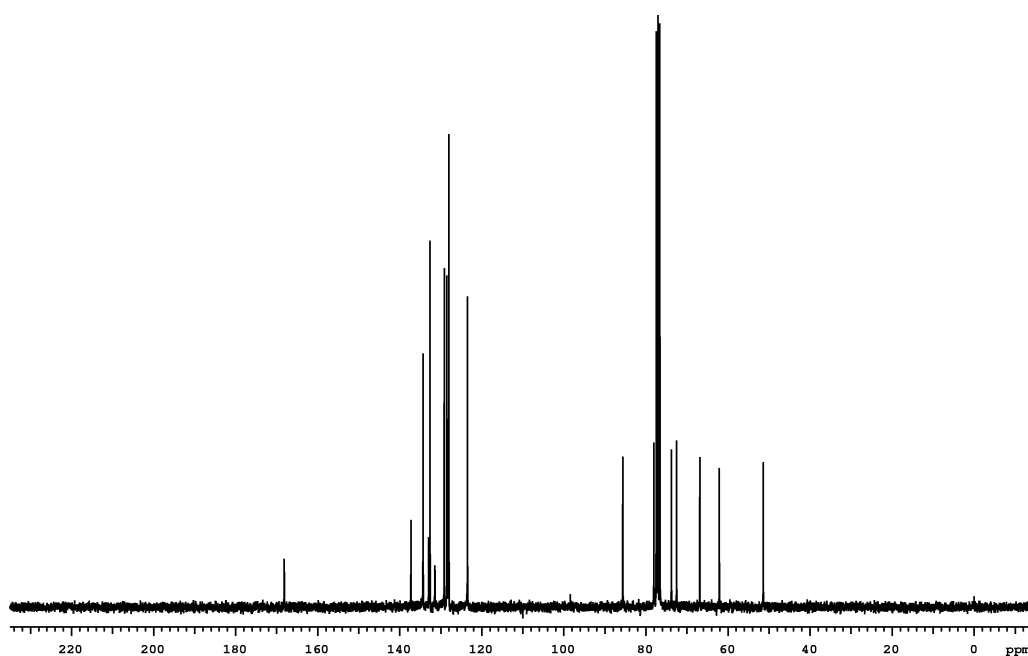

**Figure S13.**  $^{13}\text{C}$  NMR spectrum of compound **6** in  $\text{CDCl}_3$  (75.45 MHz).

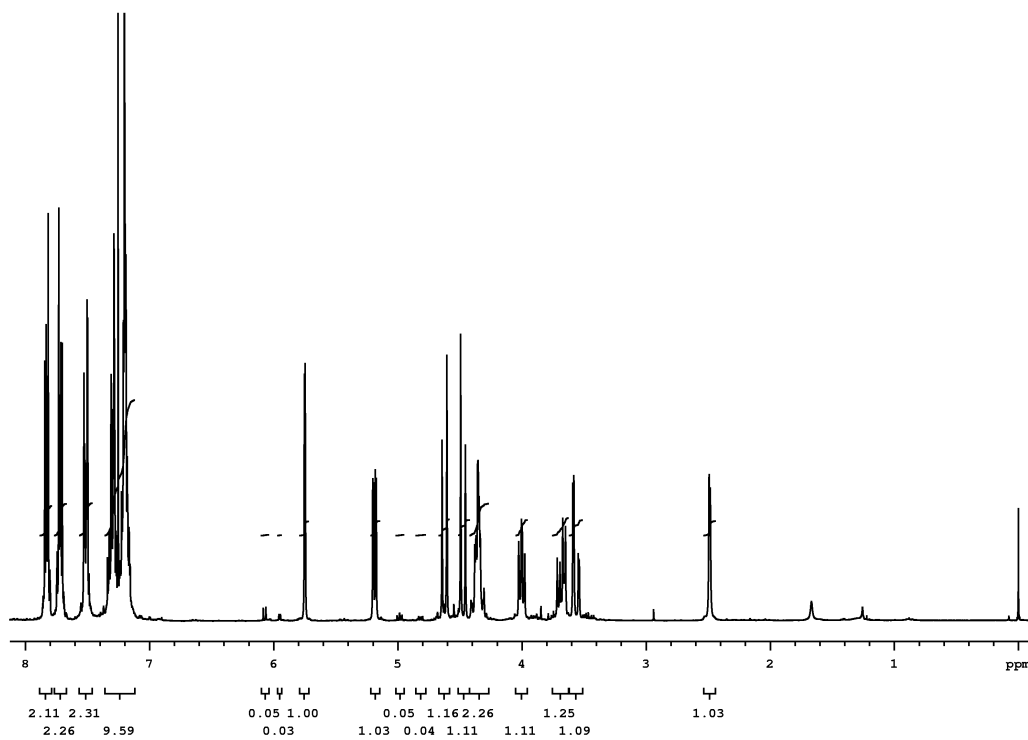

**Figure S14.** <sup>1</sup>H NMR spectrum of compound **7** in CDCl<sub>3</sub> (300 MHz).

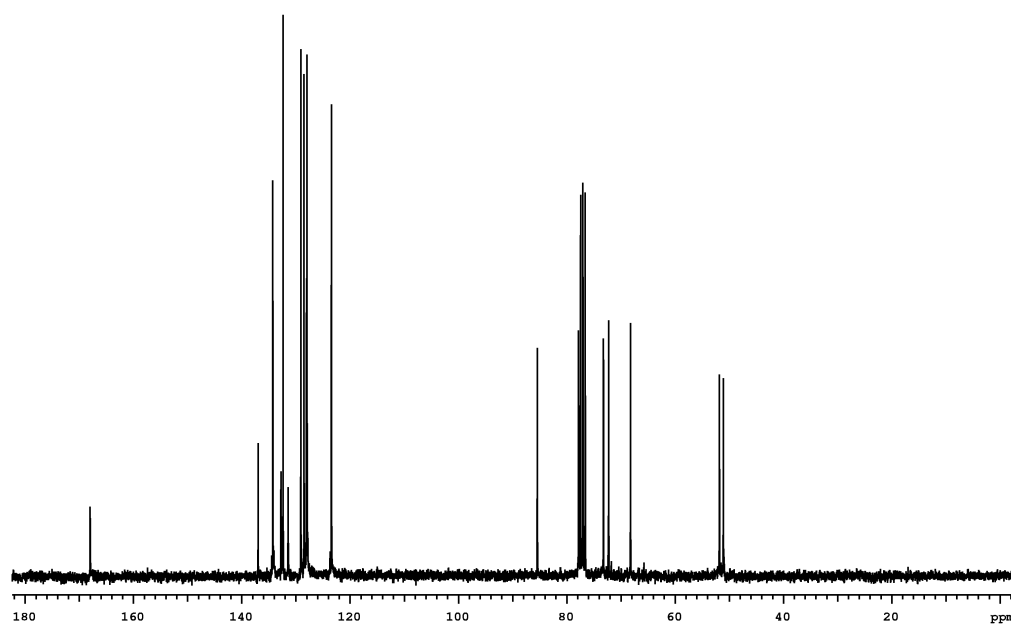

**Figure S15.** <sup>13</sup>C NMR spectrum of compound **7** in CDCl<sub>3</sub> (75.45 MHz).

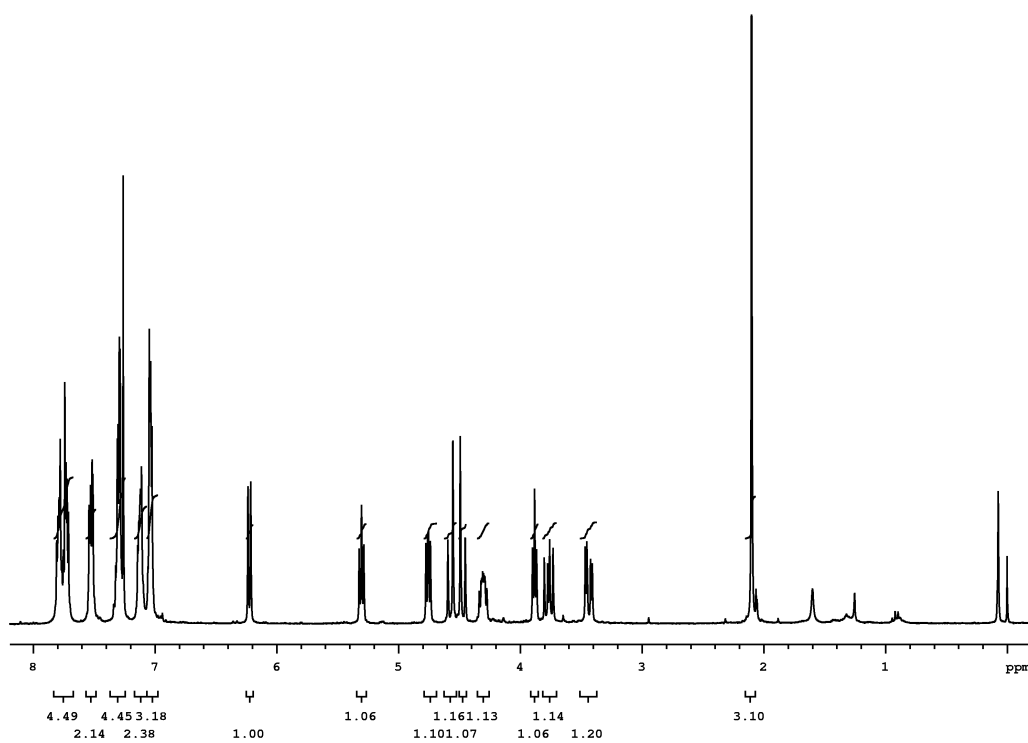

**Figure S16.** <sup>1</sup>H NMR spectrum of compound **8** in CDCl<sub>3</sub> (300 MHz).

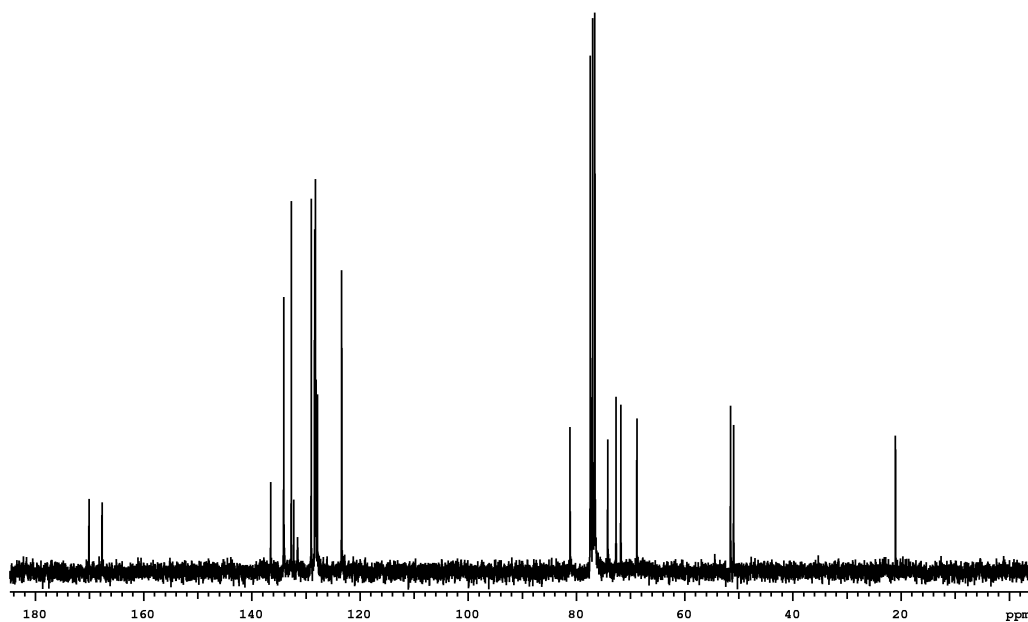

**Figure S17.** <sup>13</sup>C NMR spectrum of compound **8** in CDCl<sub>3</sub> (75.45 MHz).

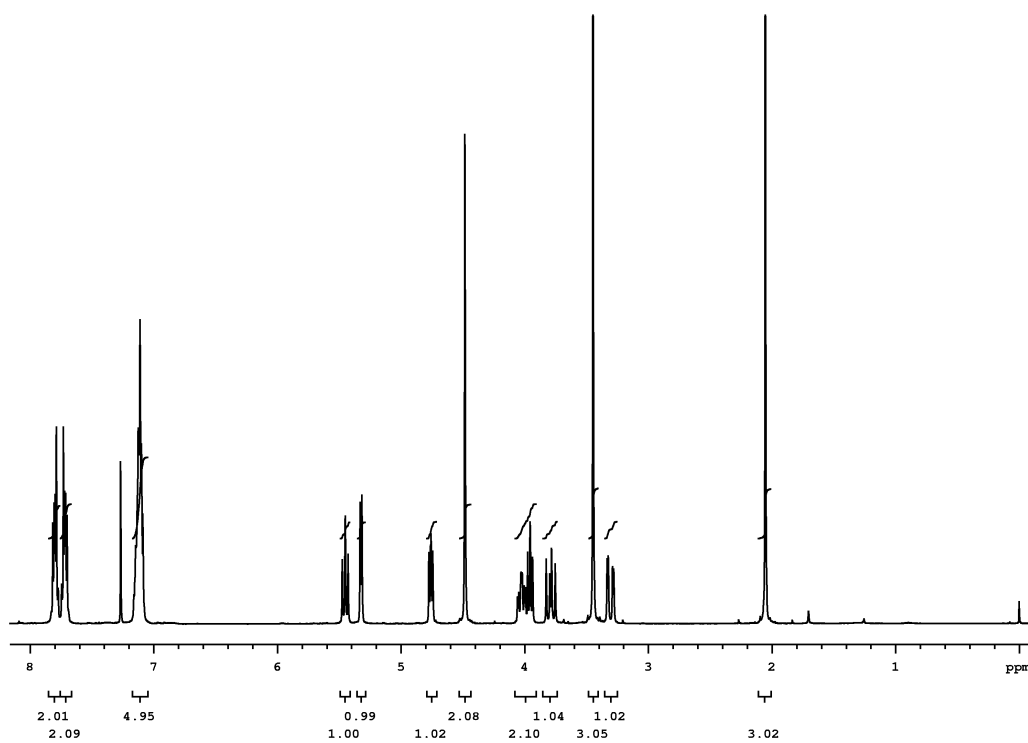

**Figure S18.** <sup>1</sup>H NMR spectrum of compound **9** in CDCl<sub>3</sub> (300 MHz).

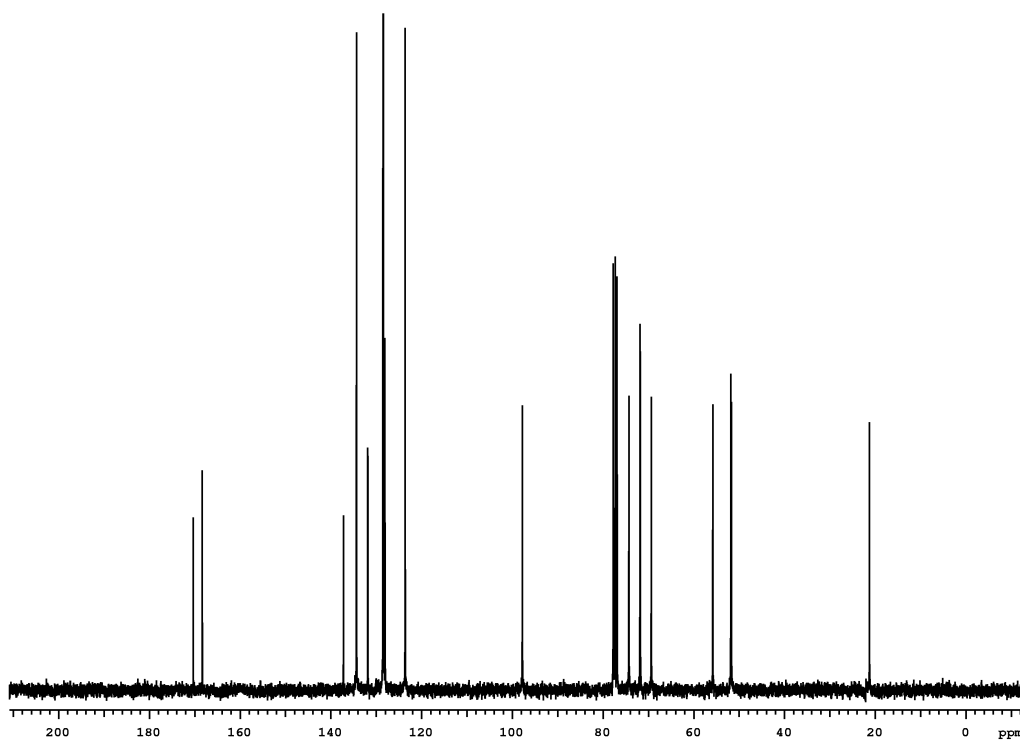

**Figure S19.** <sup>13</sup>C NMR spectrum of compound **9** in CDCl<sub>3</sub> (75.45 MHz).

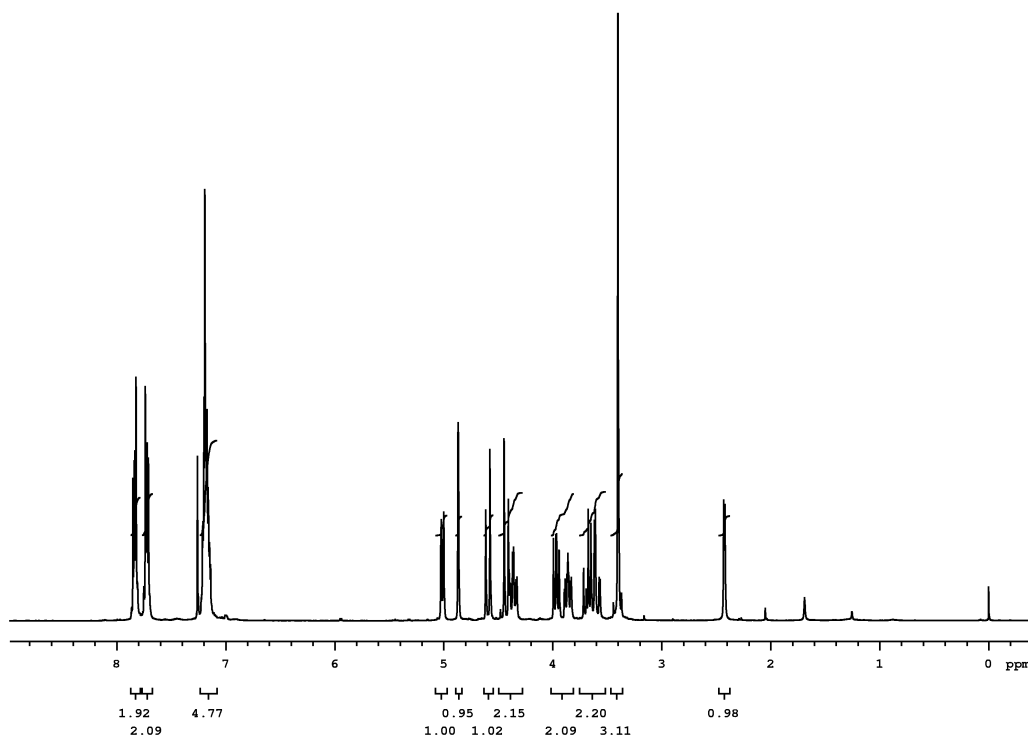

**Figure S20.**  $^1\text{H}$  NMR spectrum of compound **10** in  $\text{CDCl}_3$  (300 MHz).

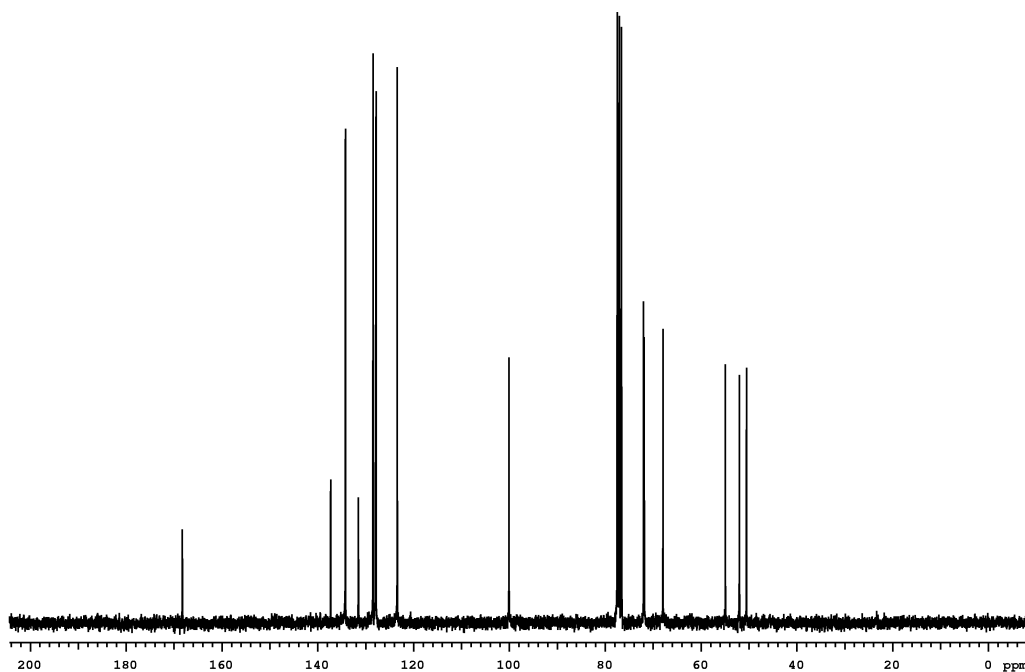

**Figure S21.**  $^{13}\text{C}$  NMR spectrum of compound **10** in  $\text{CDCl}_3$  (75.45 MHz).

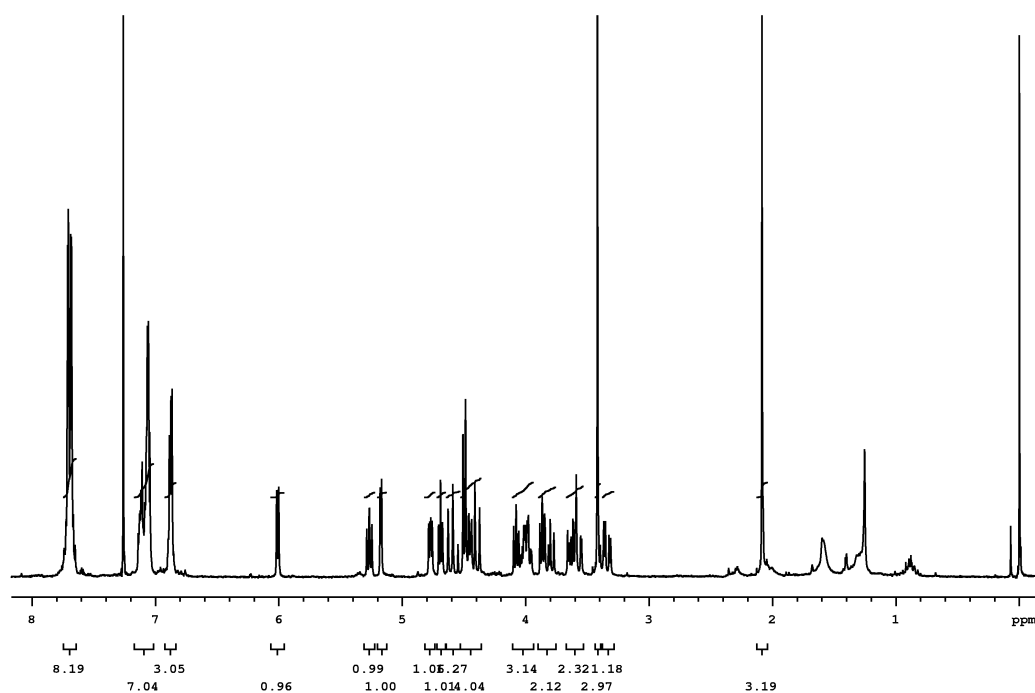

**Figure S22.** <sup>1</sup>H NMR spectrum of compound **11** in CDCl<sub>3</sub> (300 MHz).

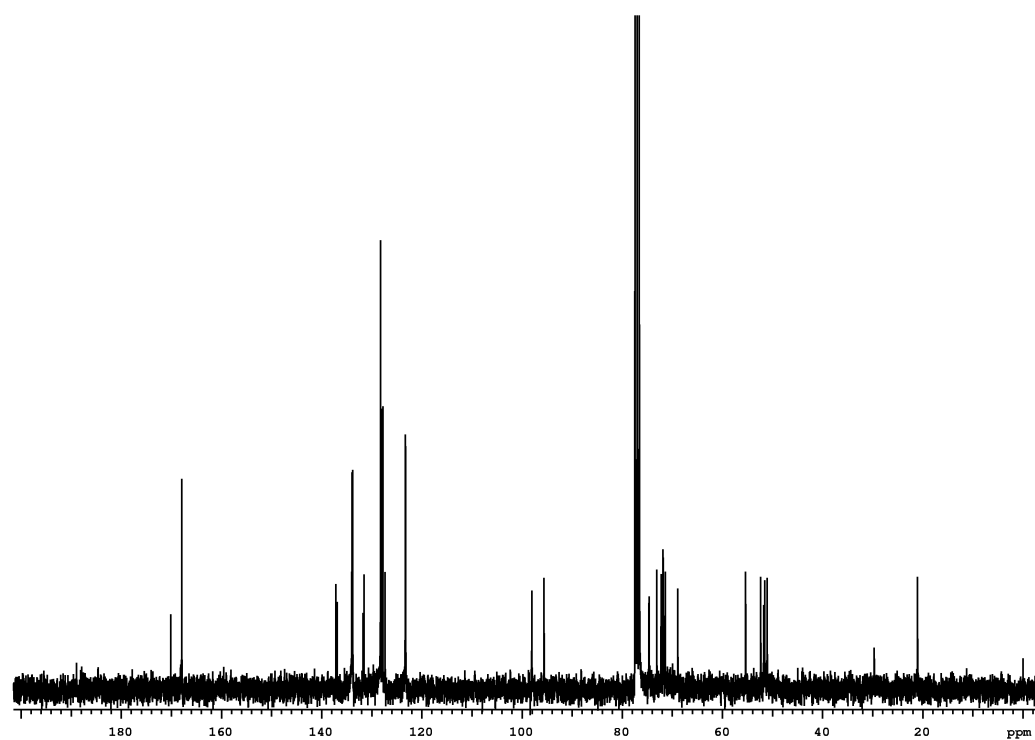

**Figure S23.** <sup>13</sup>C NMR spectrum of compound **11** in CDCl<sub>3</sub> (75.45 MHz).

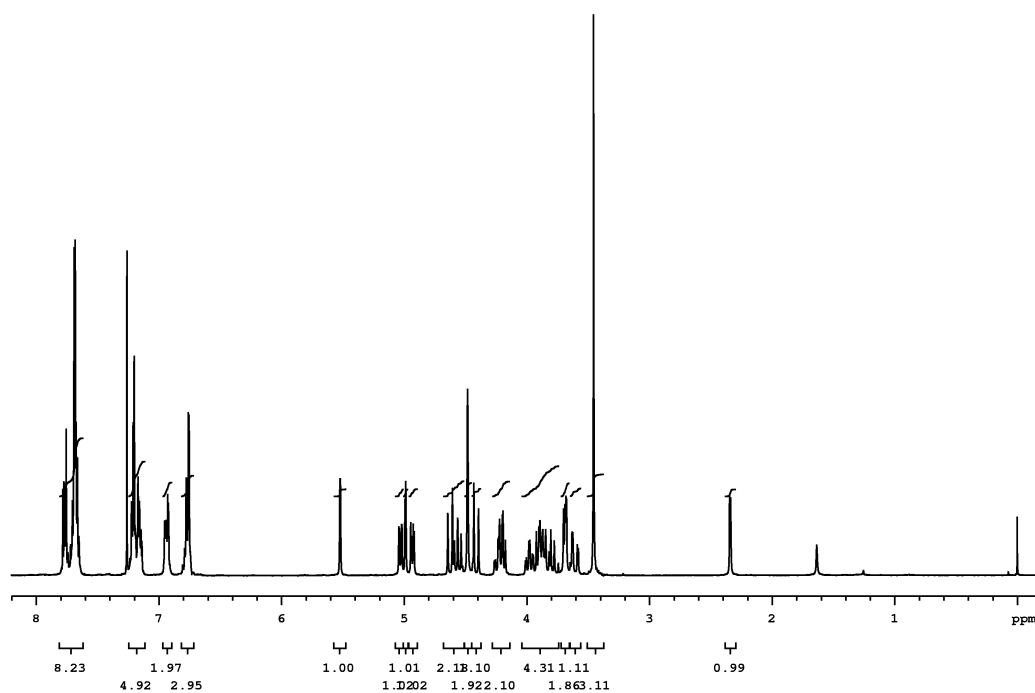

**Figure S24.** <sup>1</sup>H NMR spectrum of compound **12** in CDCl<sub>3</sub> (300 MHz).

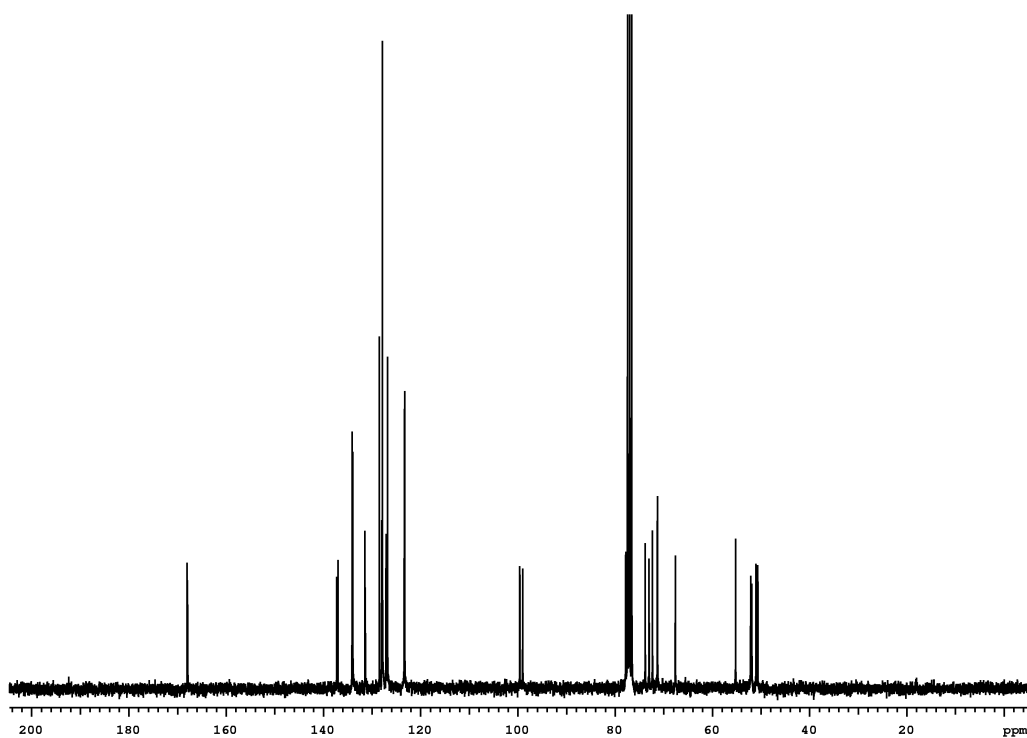

**Figure S25.** <sup>13</sup>C NMR spectrum of compound **12** in CDCl<sub>3</sub> (75.45 MHz).

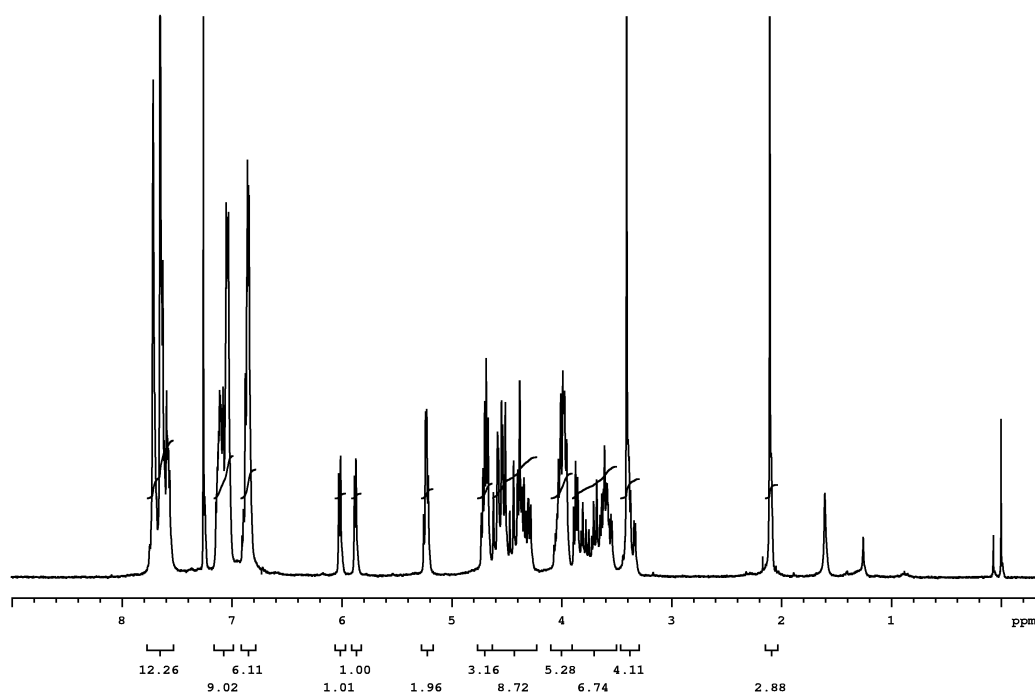

**Figure S26.** <sup>1</sup>H NMR spectrum of compound **13** in CDCl<sub>3</sub> (300 MHz).

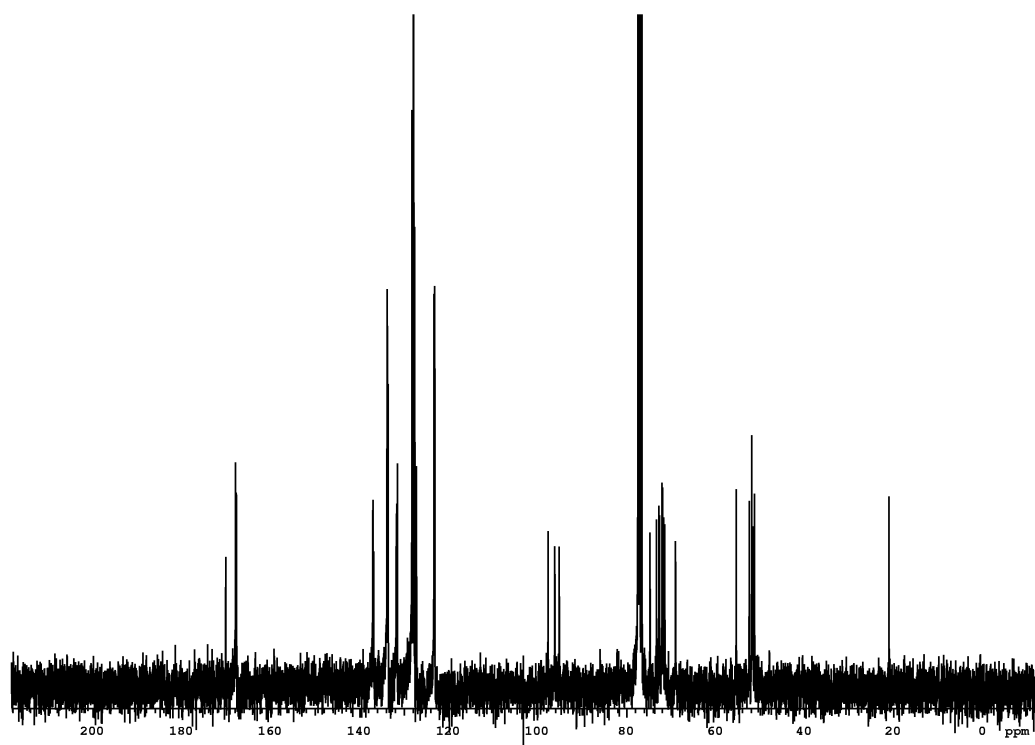

**Figure S27.** <sup>13</sup>C NMR spectrum of compound **13** in CDCl<sub>3</sub> (75.45 MHz).

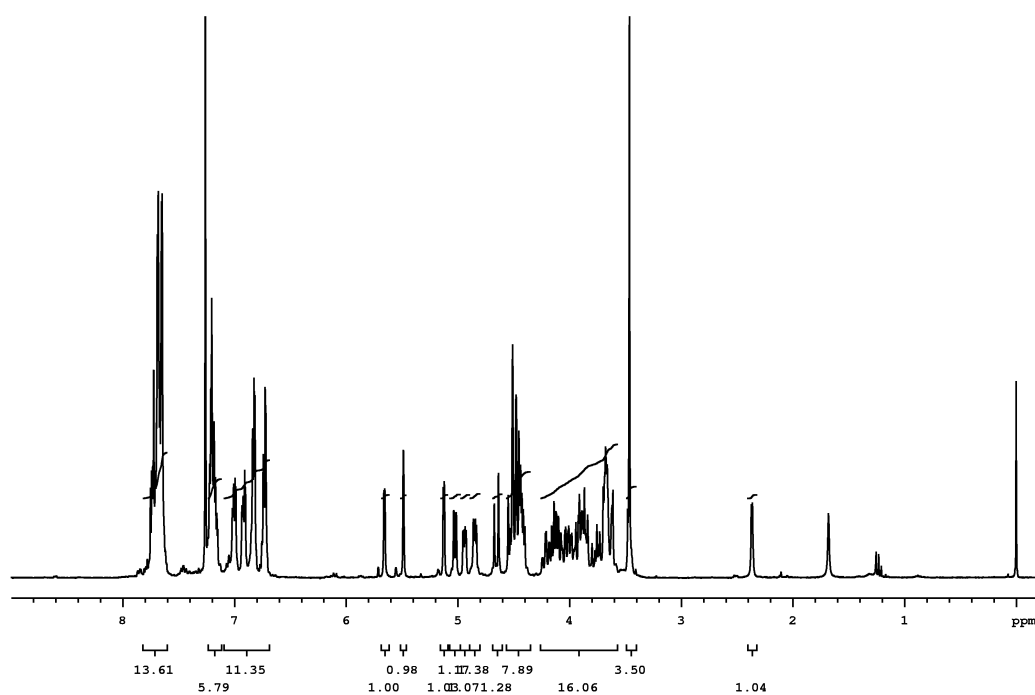

**Figure S28.**  $^1\text{H}$  NMR spectrum of compound **14** in  $\text{CDCl}_3$  (300 MHz).

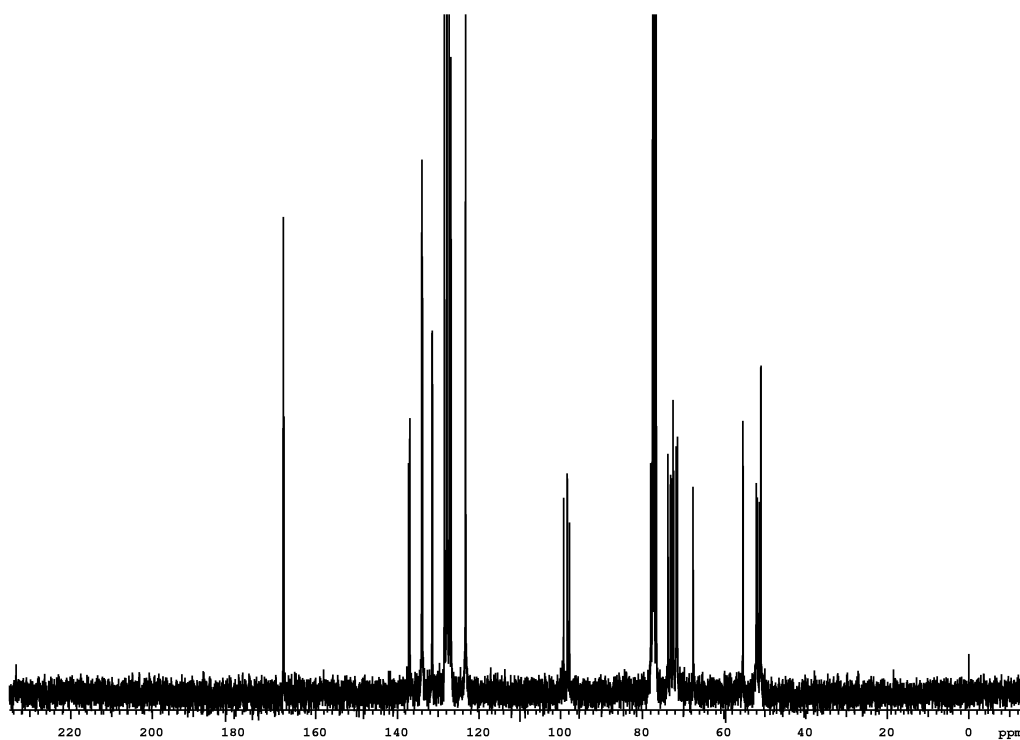

**Figure S29.**  $^{13}\text{C}$  NMR spectrum of compound **14** in  $\text{CDCl}_3$  (75.45 MHz).

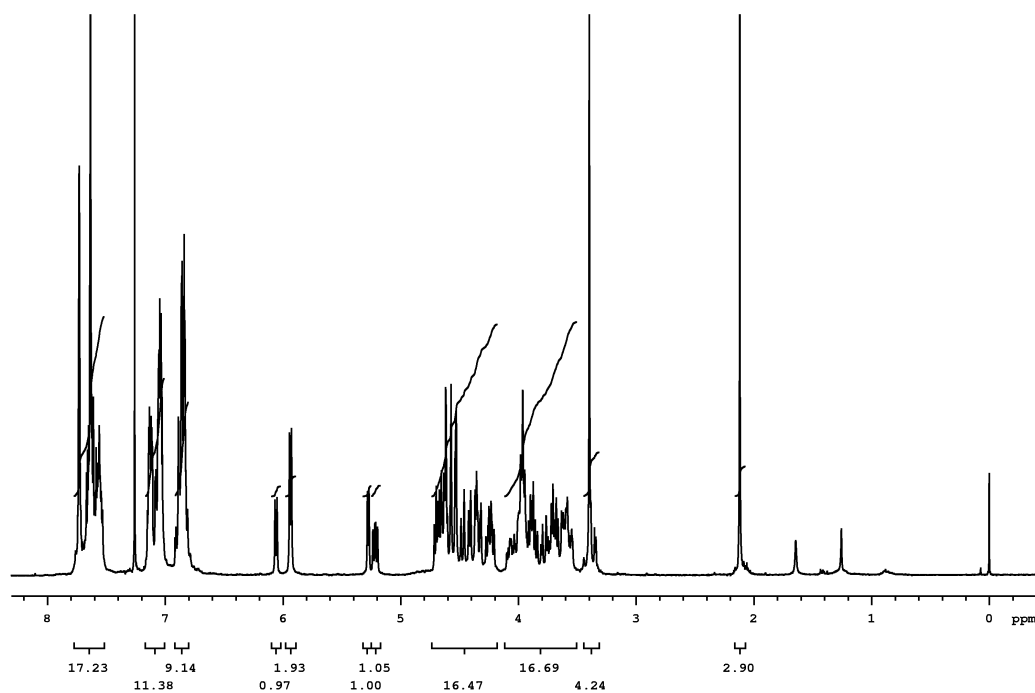

**Figure S30.**  $^1\text{H}$  NMR spectrum of compound **15** in  $\text{CDCl}_3$  (300 MHz).

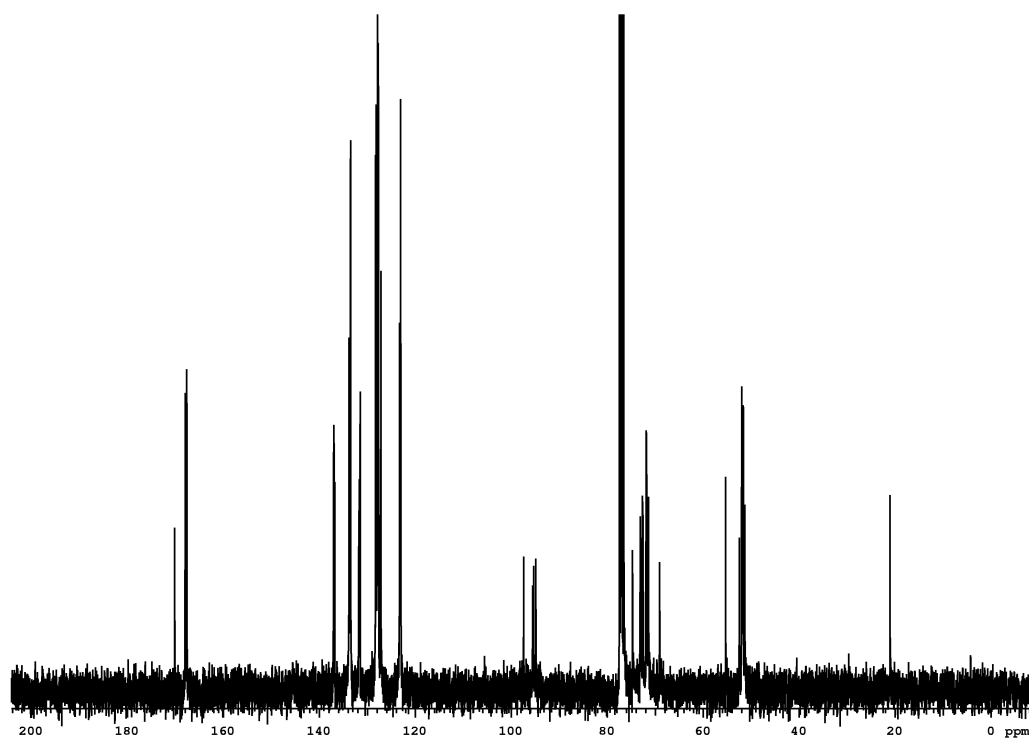

**Figure S31.**  $^{13}\text{C}$  NMR spectrum of compound **15** in  $\text{CDCl}_3$  (75.45 MHz).

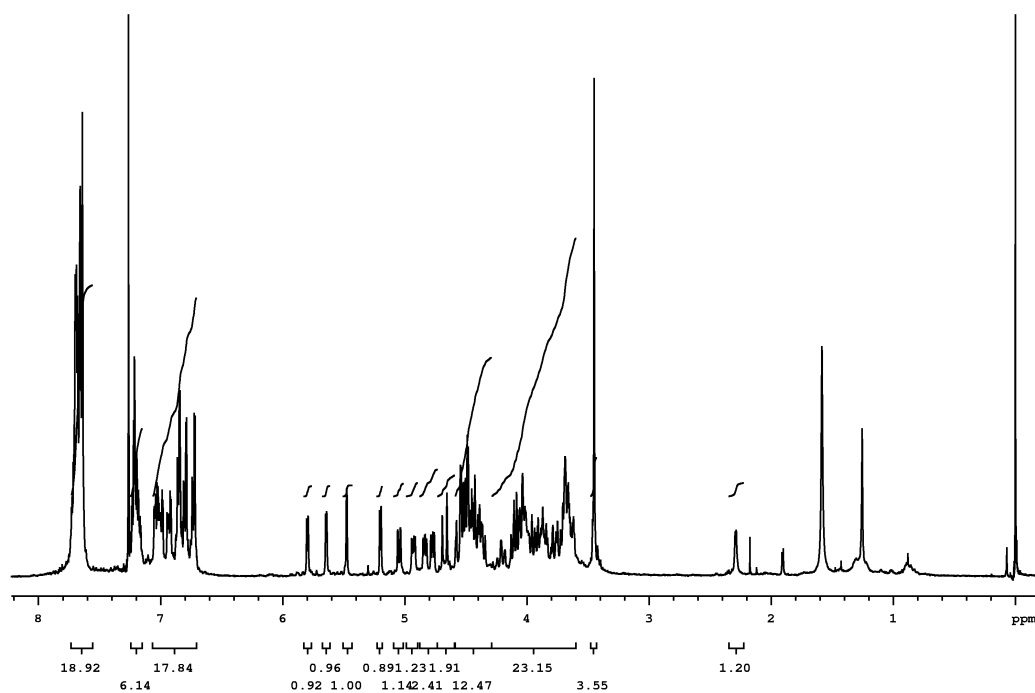

**Figure S32.**  $^1\text{H}$  NMR spectrum of compound **16** in  $\text{CDCl}_3$  (300 MHz).

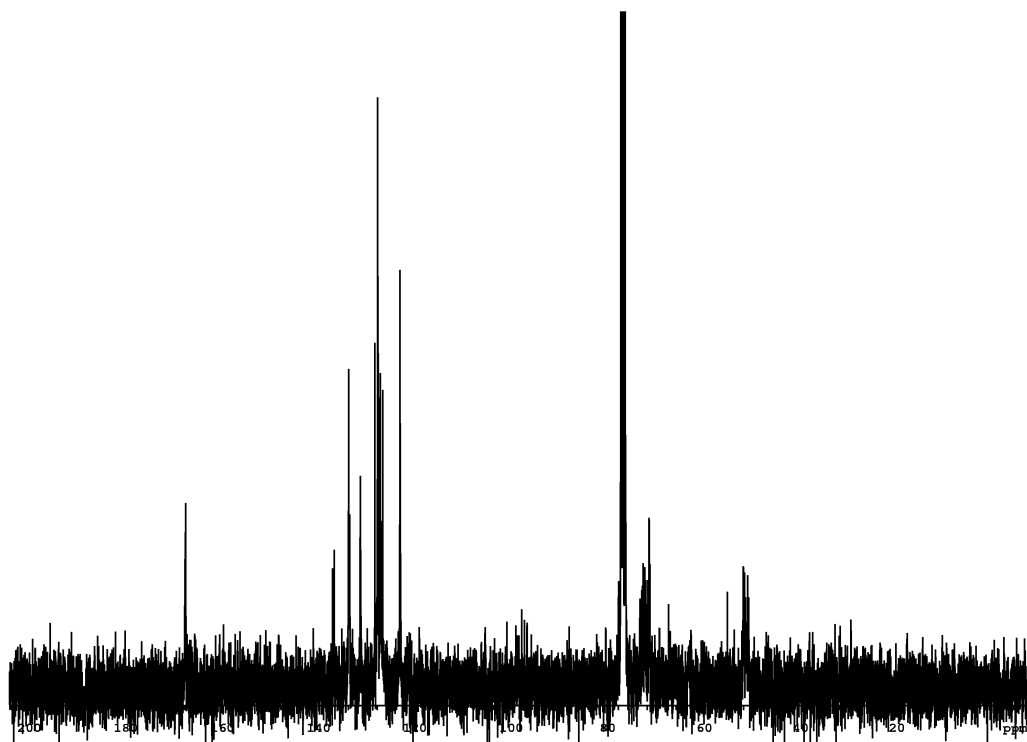

**Figure S33.**  $^{13}\text{C}$  NMR spectrum of compound **16** in  $\text{CDCl}_3$  (75.45 MHz).

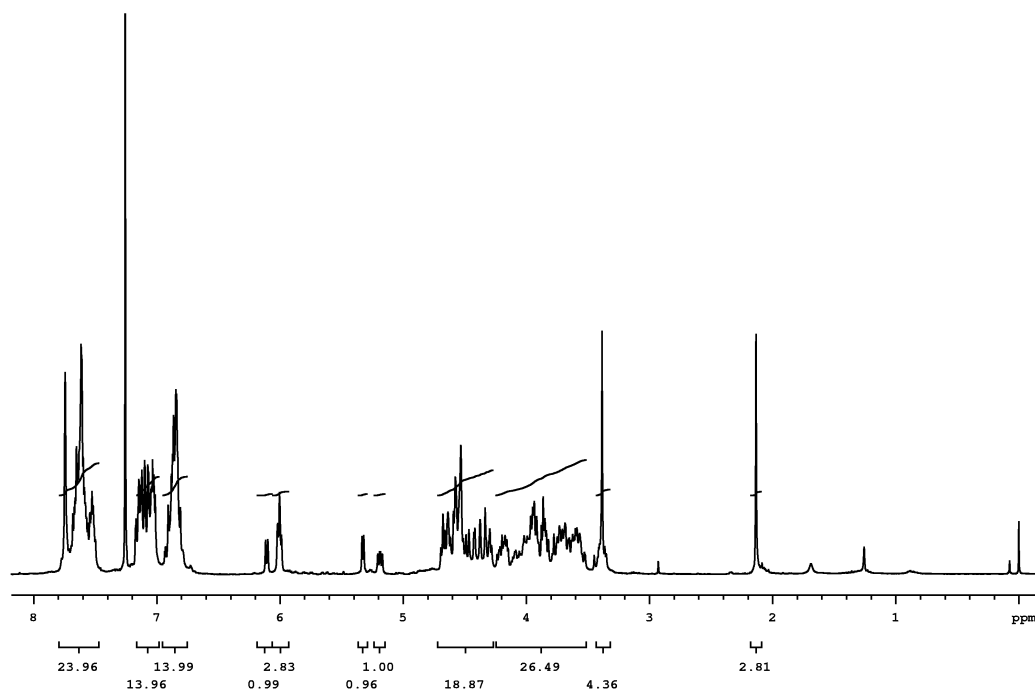

**Figure S34.** <sup>1</sup>H NMR spectrum of compound **17** in CDCl<sub>3</sub> (300 MHz).

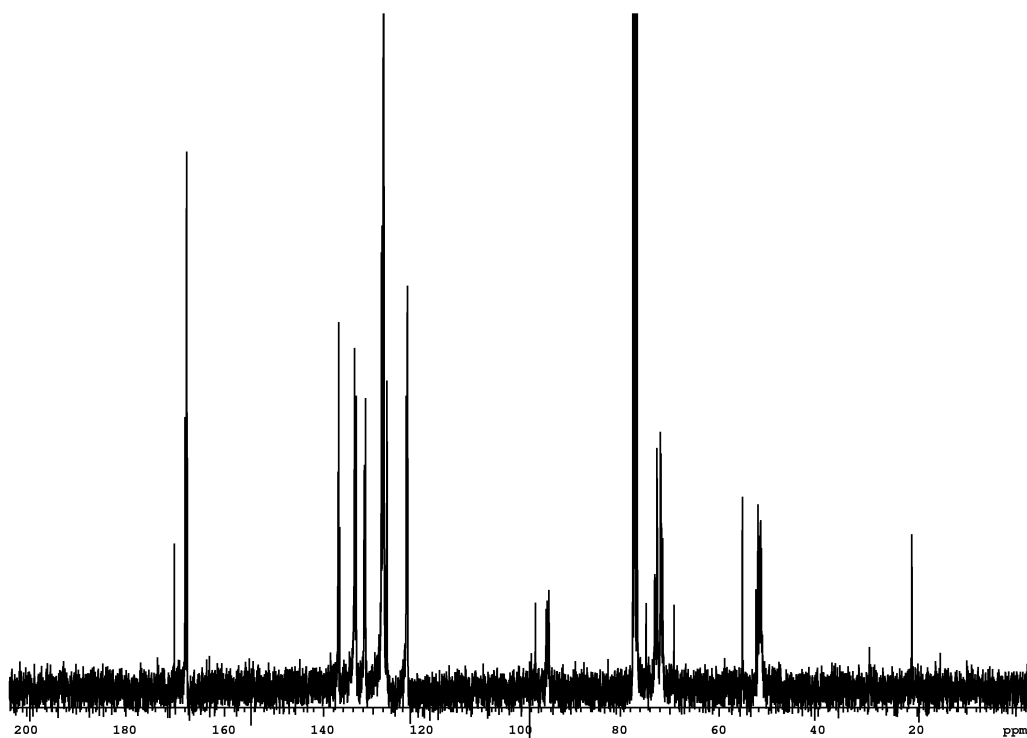

**Figure S35.** <sup>13</sup>C NMR spectrum of compound **17** in CDCl<sub>3</sub> (75.45 MHz).

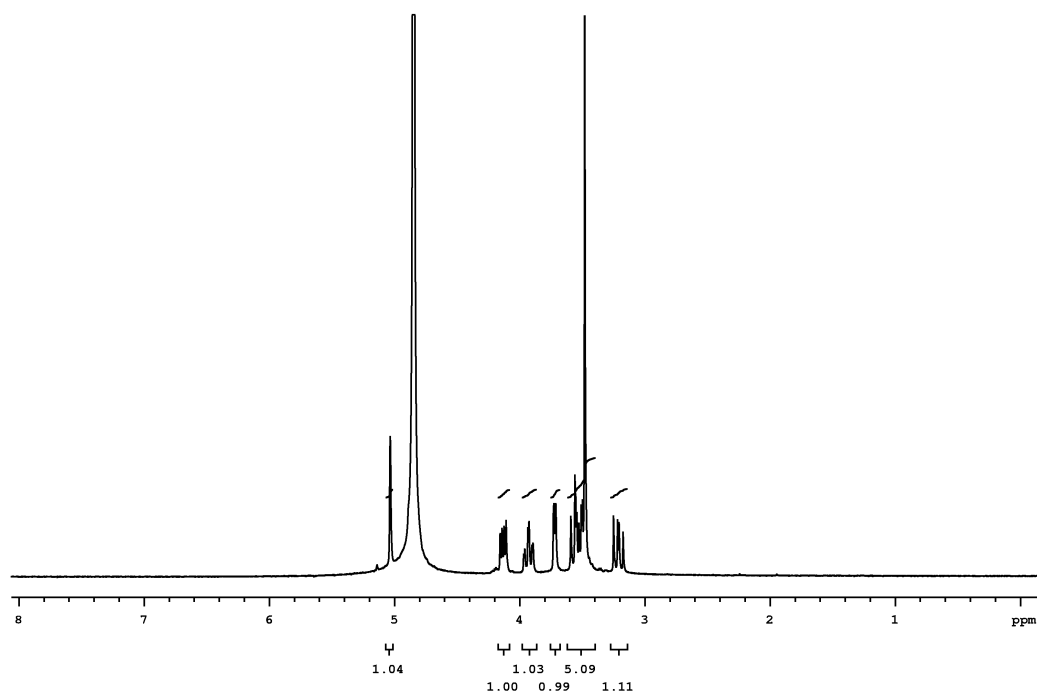

**Figure S36.** <sup>1</sup>H NMR spectrum of compound **23** in D<sub>2</sub>O (300 MHz).

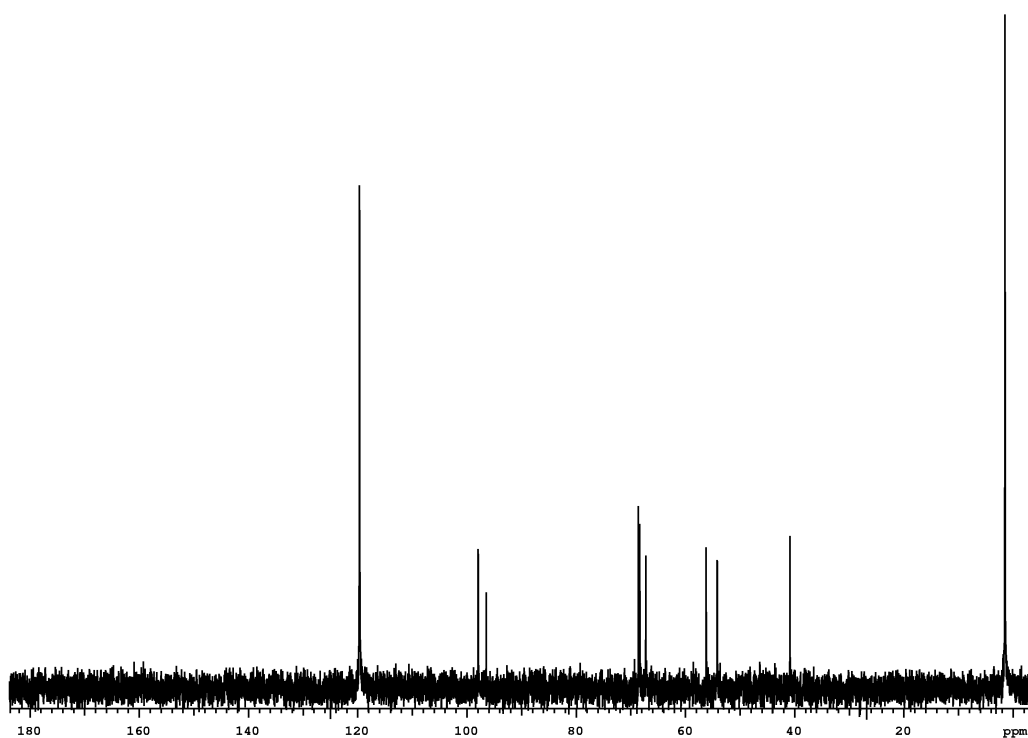

**Figure S37.** <sup>13</sup>C NMR spectrum of compound **23** in D<sub>2</sub>O (75.45 MHz).

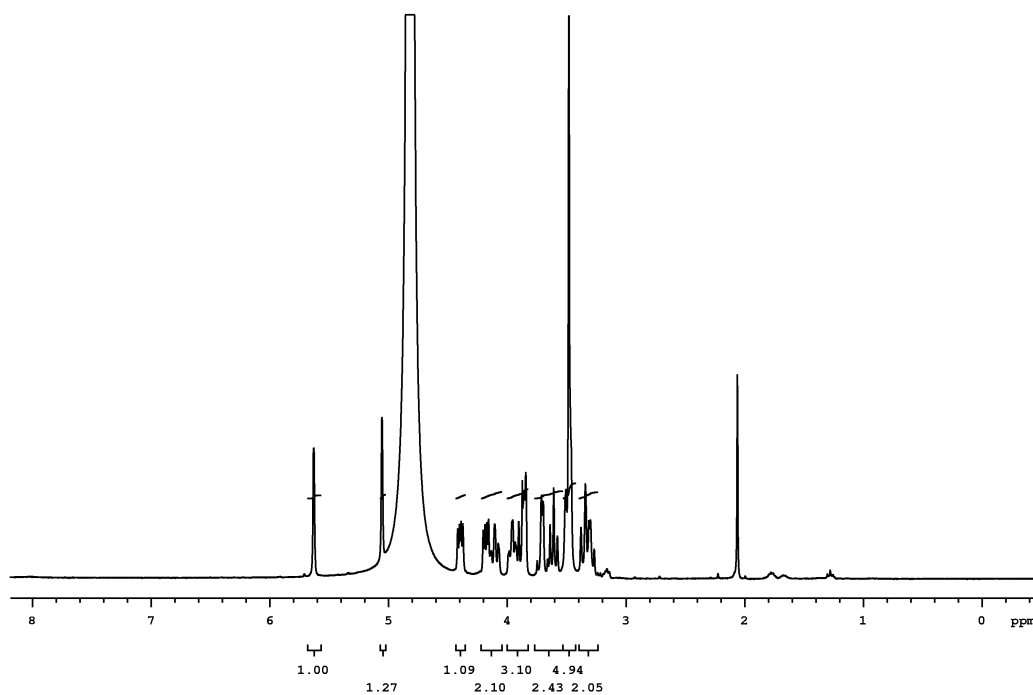

**Figure S38.** <sup>1</sup>H NMR spectrum of compound **24** in D<sub>2</sub>O (300 MHz).

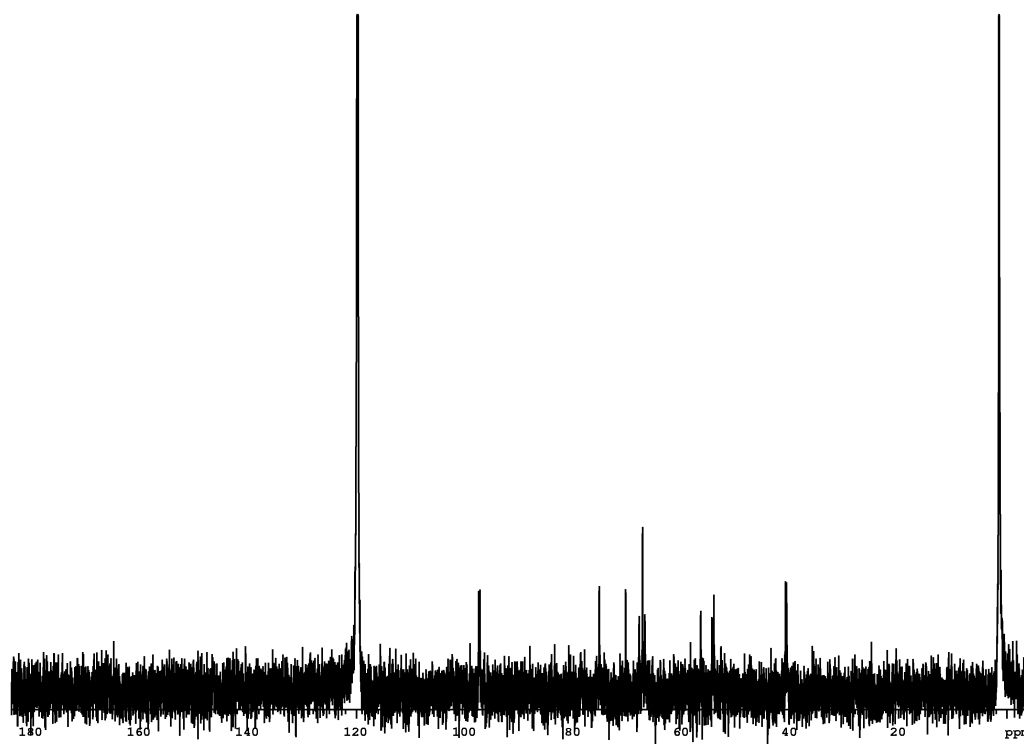

**Figure S39.** <sup>13</sup>C NMR spectrum of compound **24** in D<sub>2</sub>O (75.45 MHz).

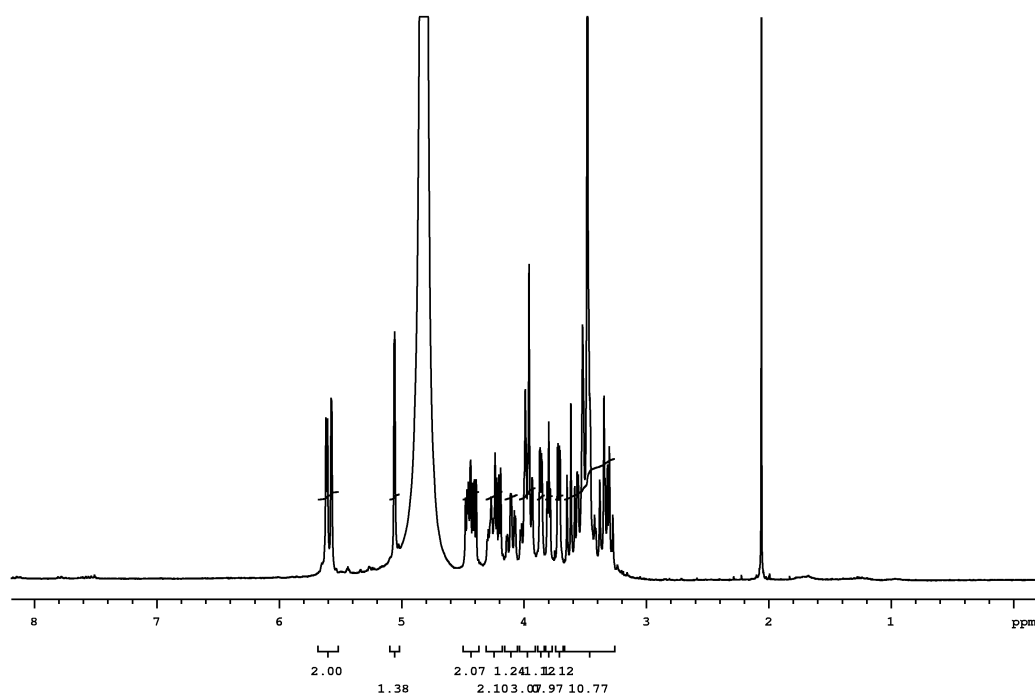

**Figure S40.** <sup>1</sup>H NMR spectrum of compound **25** in D<sub>2</sub>O (300 MHz).

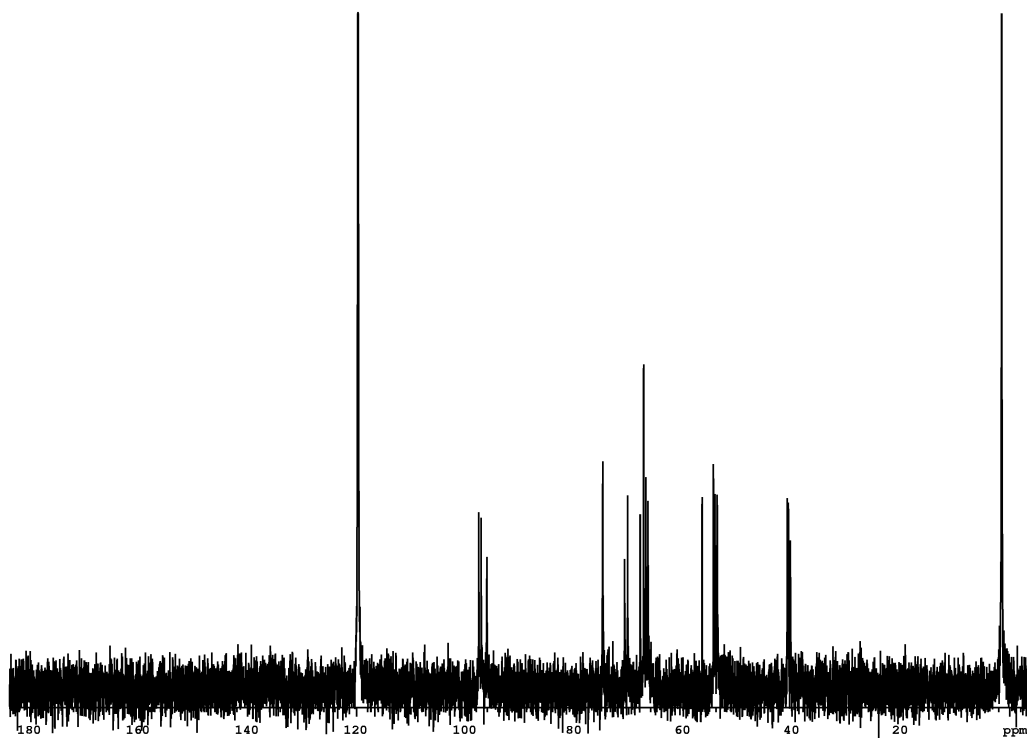

**Figure S41.** <sup>13</sup>C NMR spectrum of compound **25** in D<sub>2</sub>O (75.45 MHz).

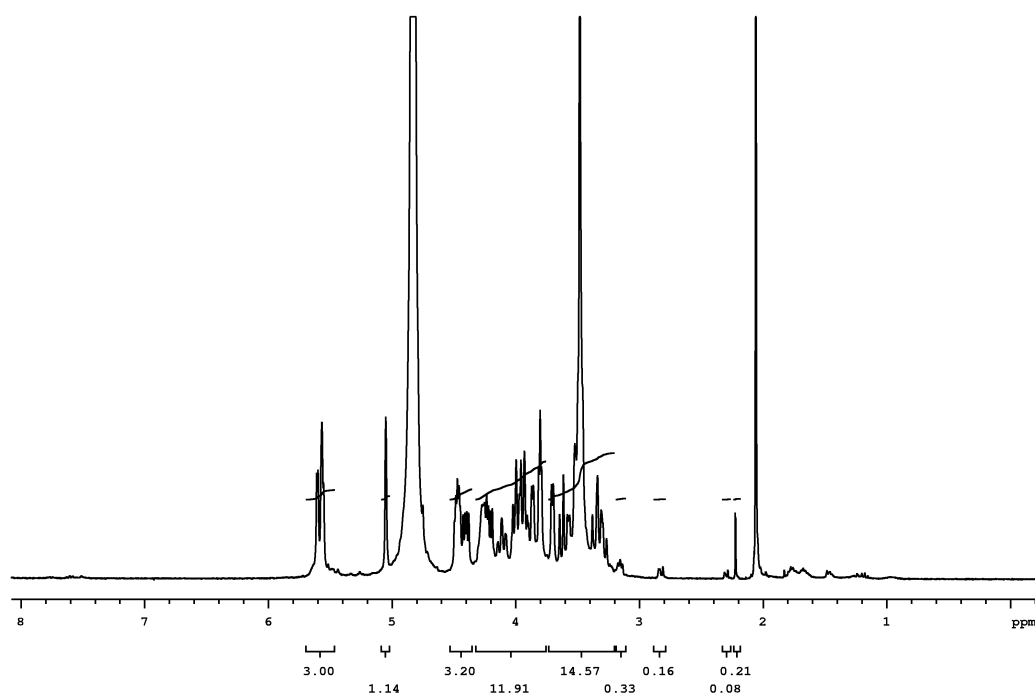

**Figure S42.** <sup>1</sup>H NMR spectrum of compound **26** in D<sub>2</sub>O (300 MHz).

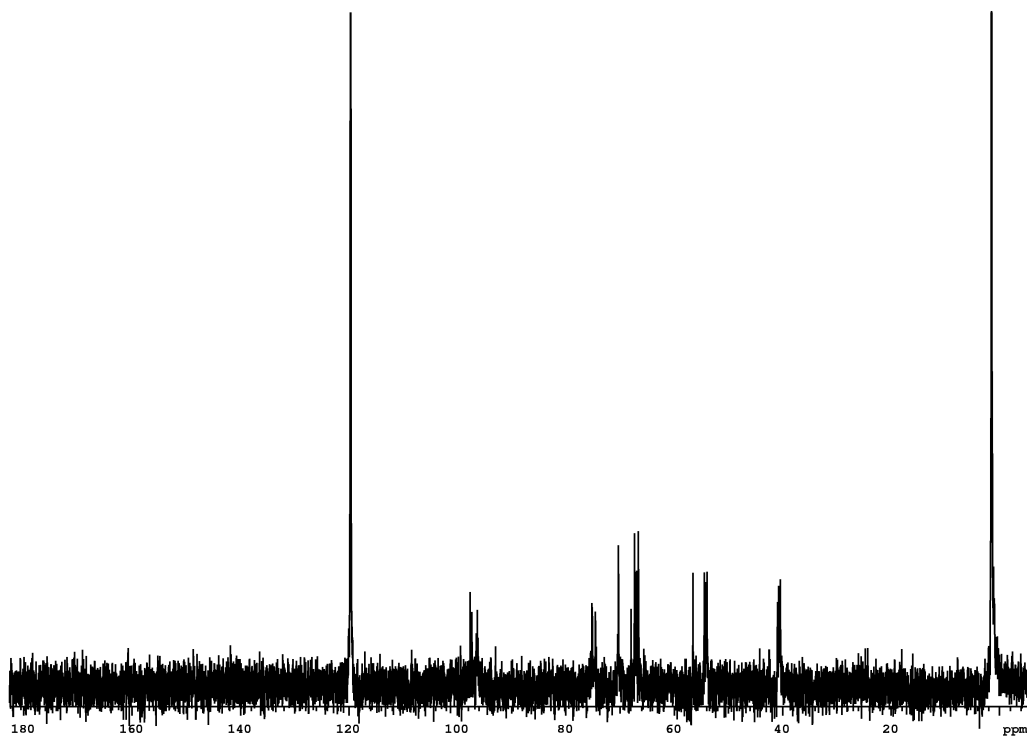

**Figure S43.** <sup>13</sup>C NMR spectrum of compound **26** in D<sub>2</sub>O (75.45 MHz).

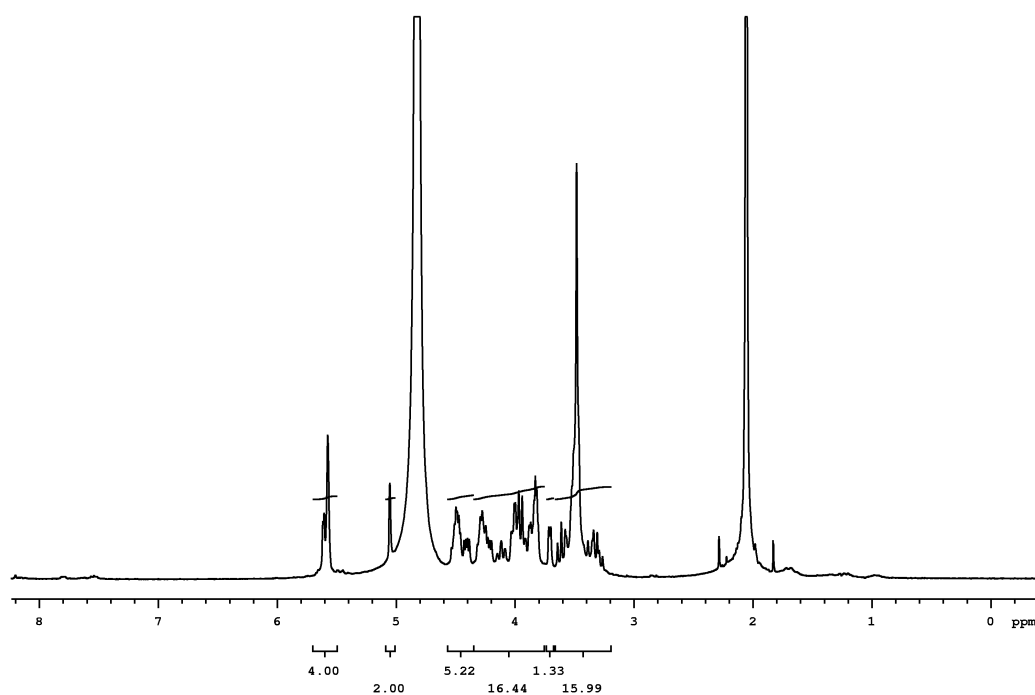

**Figure S44.**  $^1\text{H}$  NMR spectrum of compound **27** in  $\text{D}_2\text{O}$  (300 MHz).

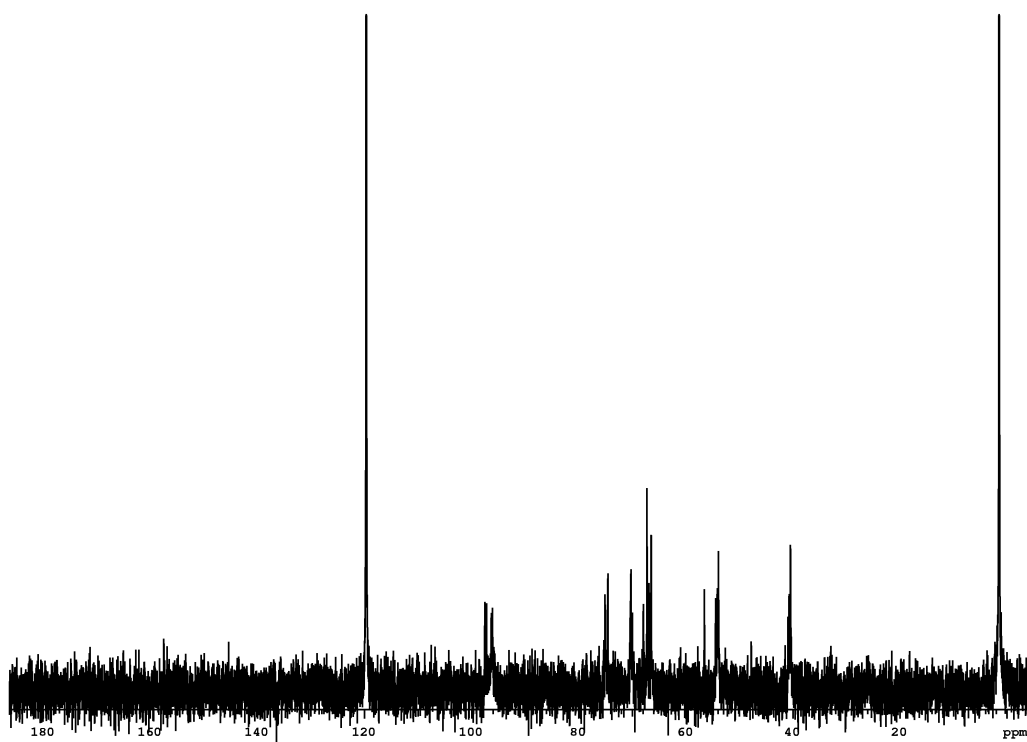

**Figure S45.**  $^{13}\text{C}$  NMR spectrum of compound **27** in  $\text{D}_2\text{O}$  (75.45 MHz).
